# Supplementary material for: Thrombin induces morphological and inflammatory astrocytic responses via activation of PAR1 receptor
Source: PubMed Central journal article supplement (PMC8995373; doi:10.1038/s41420-022-00997-4), 2022-04-11
Supplement: 41420_2022_997_MOESM4_ESM.pdf [file 41420_2022_997_MOESM4_ESM.pdf]

Fig5.A

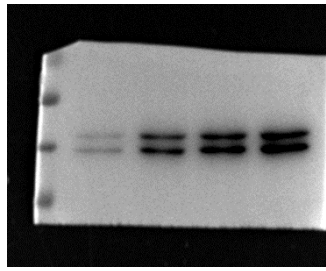

P- ERK

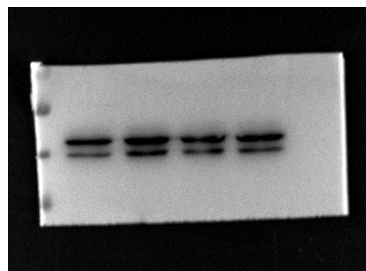

ERK

Fig5.A

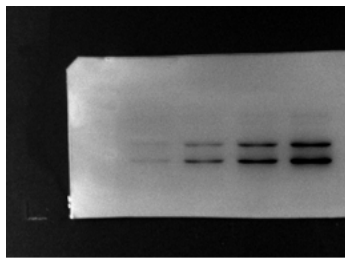

P-JNK

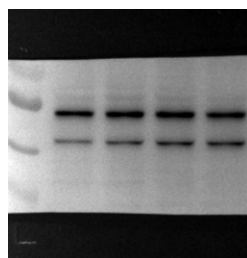

JNK

Fig5.A

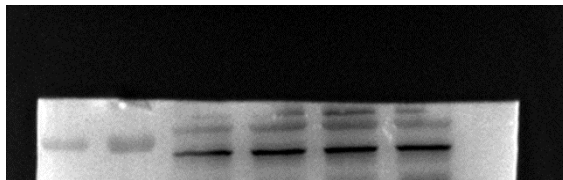

P-P38

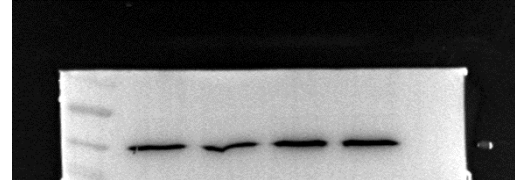

P38

Fig5.A

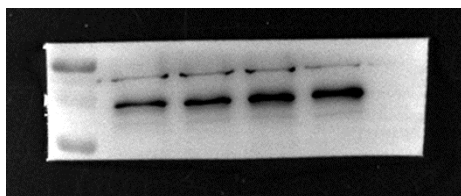

NF-κB

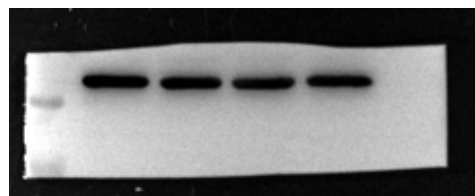

β-actin

Fig6.A

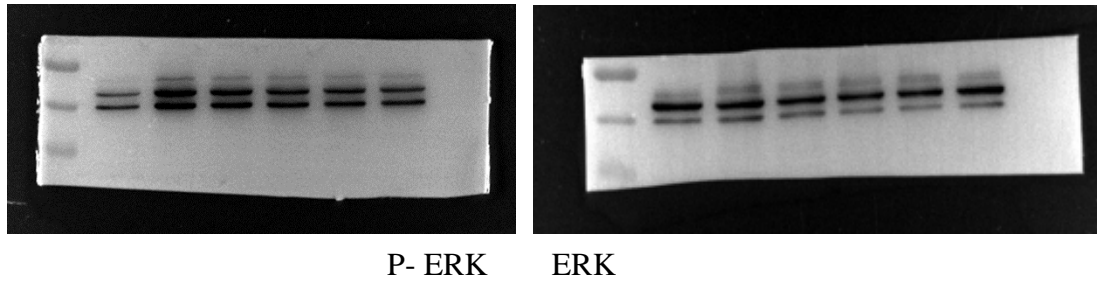

Fig6.A

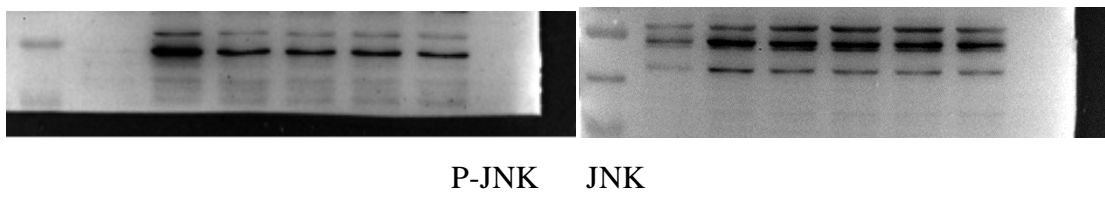

Fig6.A

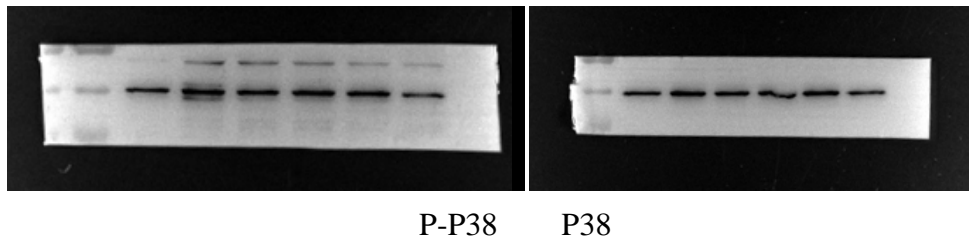

Fig6.A

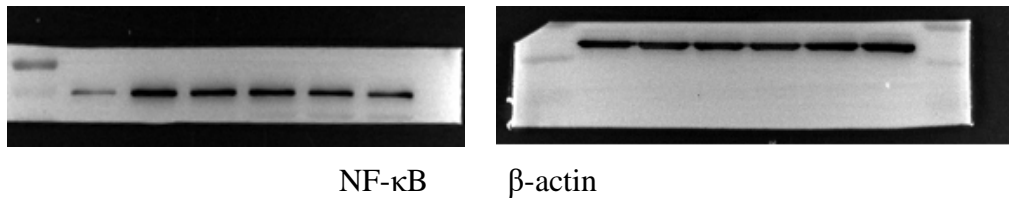

FigS3.C

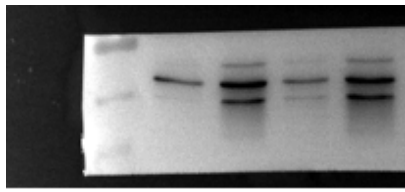

P- ERK

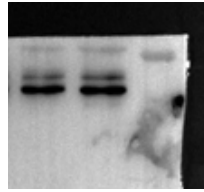

ERK

FigS3.C

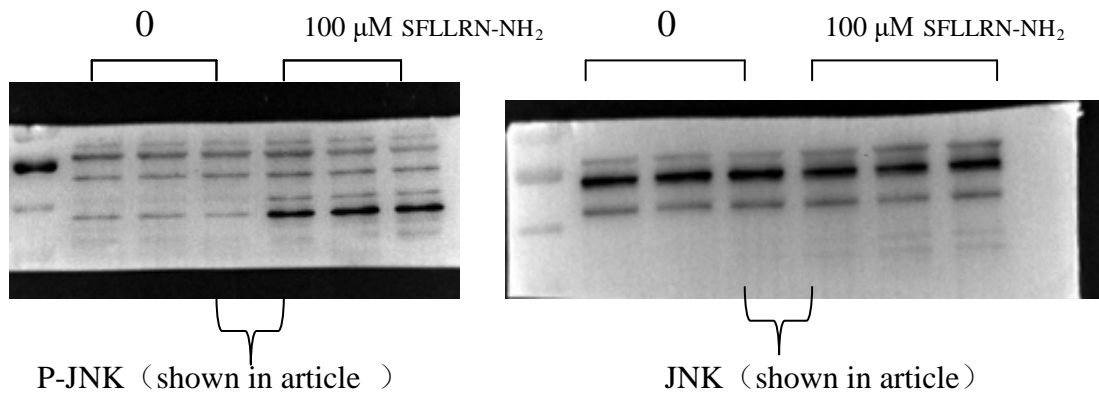

FigS3.C

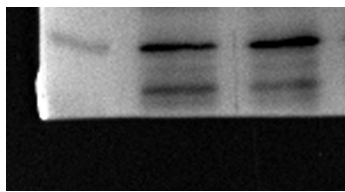

P-P38

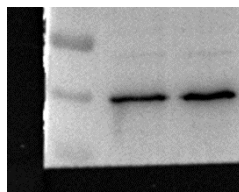

P38

FigS3.C

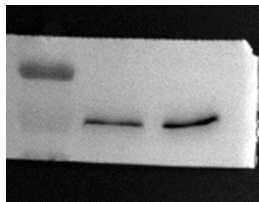

NF- $\kappa$ B

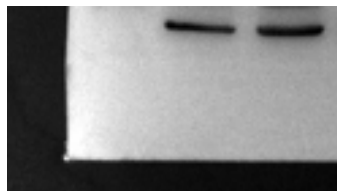

$\beta$ -actin
